# Supplementary material for: Genome-Wide Analysis of Cotton miRNAs During Whitefly Infestation Offers New Insights into Plant-Herbivore Interaction
Source: MDPI journal article supplement (doi:10.3390/ijms20215357), 2019-10-28
Supplement: s1 [file s1]

# Genome-wide analysis of cotton miRNAs during whitefly infestation offers new insights into plant-herbivore interaction

Jianying Li <sup>1</sup>, J. Joe Hull <sup>2</sup>, Sijia Liang <sup>1</sup>, Qiongqiong Wang <sup>1</sup>, Luo Chen <sup>1</sup>, Qinghua Zhang <sup>1</sup>, Maojun Wang <sup>1</sup>, Shahid Mansoon<sup>3</sup>, Xianlong Zhang<sup>1</sup> and Shuangxia Jin <sup>1\*</sup>

<sup>1</sup> National Key Laboratory of Crop Genetic Improvement, Huazhong Agricultural University, Wuhan, Hubei 430070, P. R. China

<sup>2</sup> USDA-ARS, Arid Land Agricultural Research Center, 21881 North Cardon Lane, Maricopa, AZ 85138, USA

<sup>3</sup>National Institute for Biotechnology and Genetic Engineering (NIBGE), Faisalabad, Pakistan

\* Corresponding author: [jsx@mail.hzau.edu.cn](mailto:jsx@mail.hzau.edu.cn); Tel: 027-87283955; Fax: 027-87280016

## Supplementary Figures

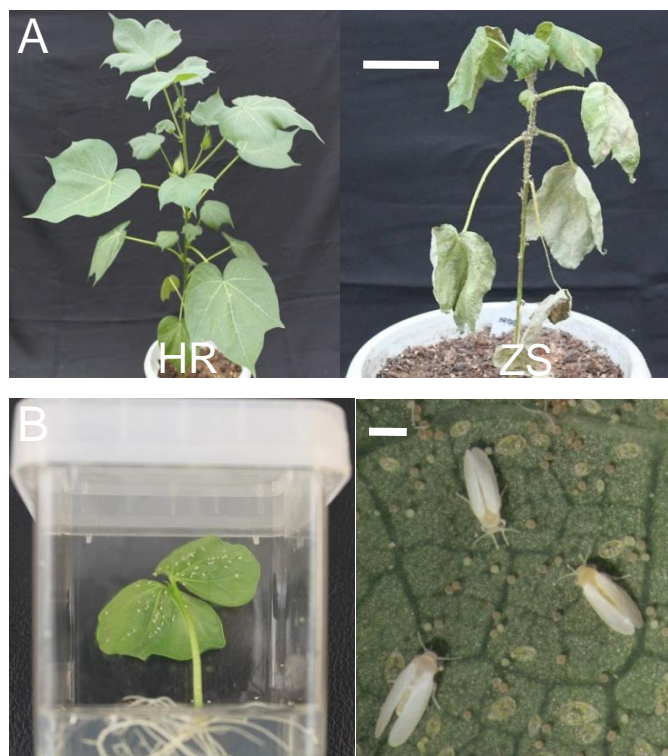

**Figure S1.** The phenotype during the whitefly infestation resistant and susceptible cotton cultivar. (A) The phenotype of HR and ZS cultivar after infestation 1 month. (B) The cotton plants infested by whitefly in a sealed chamber box.

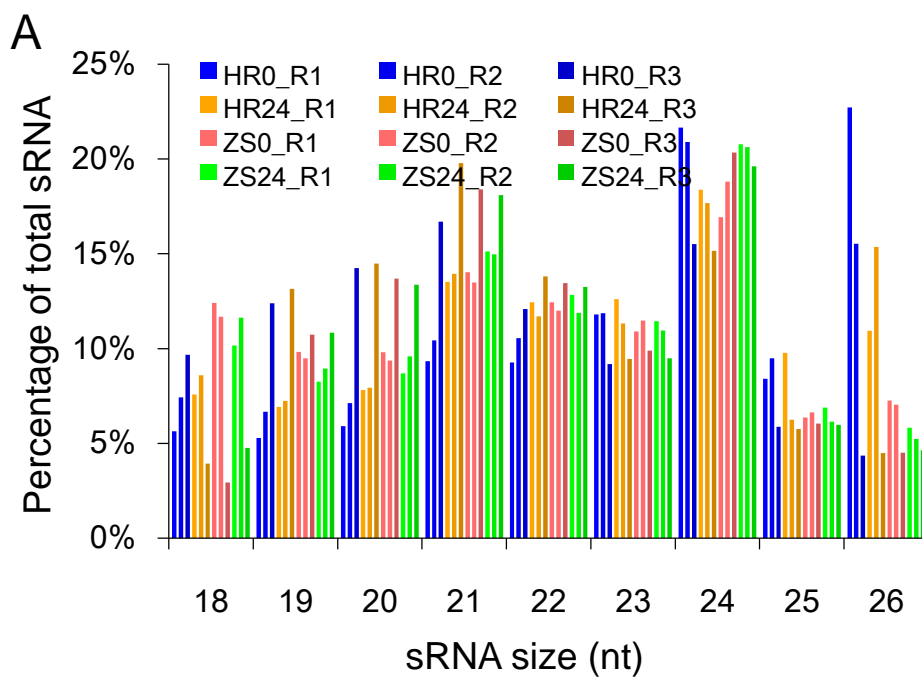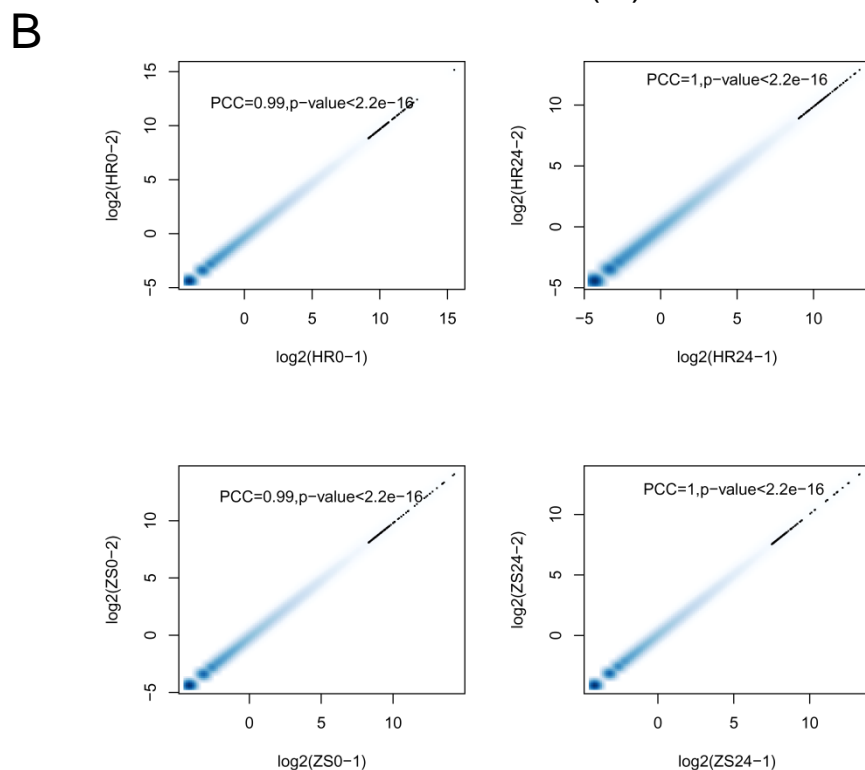

**Figure S2.** Distribution of sRNA reads in twelve libraries. (A) Distribution of total read lengths present in the three biological replicates. (B) All sRNA (miRNAs + siRNAs) expression level correlations were calculated by PCC in the two biological replicates.

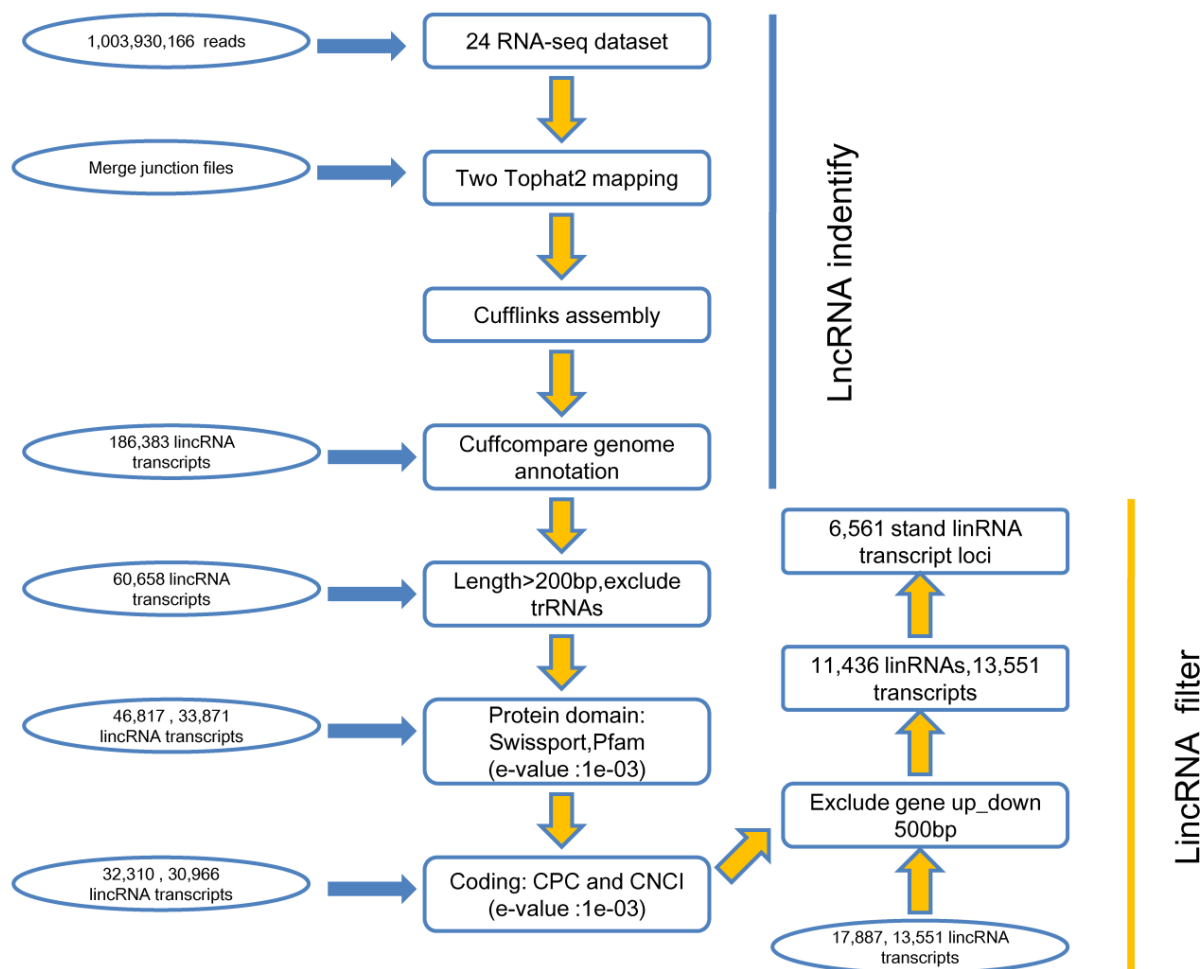

**Figure S3.** Schematic diagram of the integrative pipeline used for systematic identification of lincRNAs.

GhA05linc.520 → P132: miR171f-3p

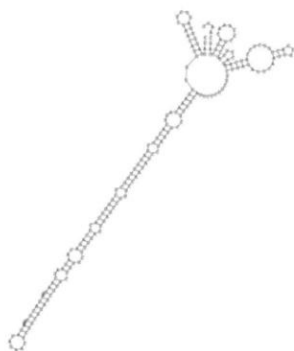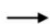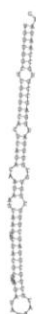

GhD06linc.129 → P168 : miR8733

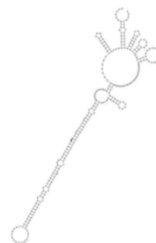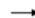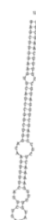

GhA05linc.451 → P181 : miR172b

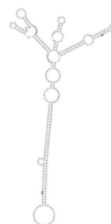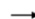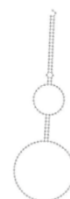

GhA07linc.319 → P147:miR166b

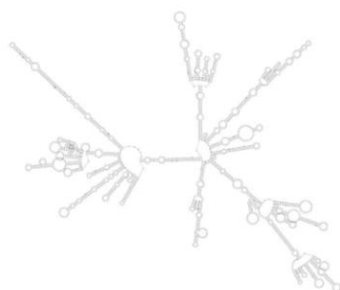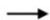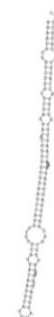

GhA08linc.292 → P111: miR166

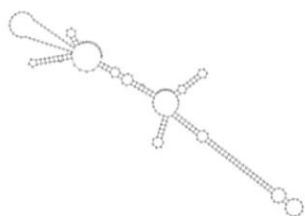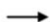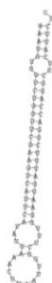

GhD09linc.75.2 → P187:miR390c

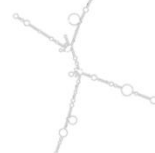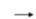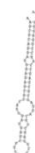

GhA07linc.14 → P193 : ghe-miR156d

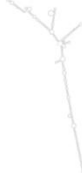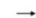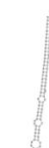

GhA07linc.38 → P72: miR482c

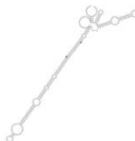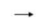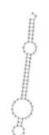

**Figure S4.** Conserved miRNA precursors generated by lincRNAs.

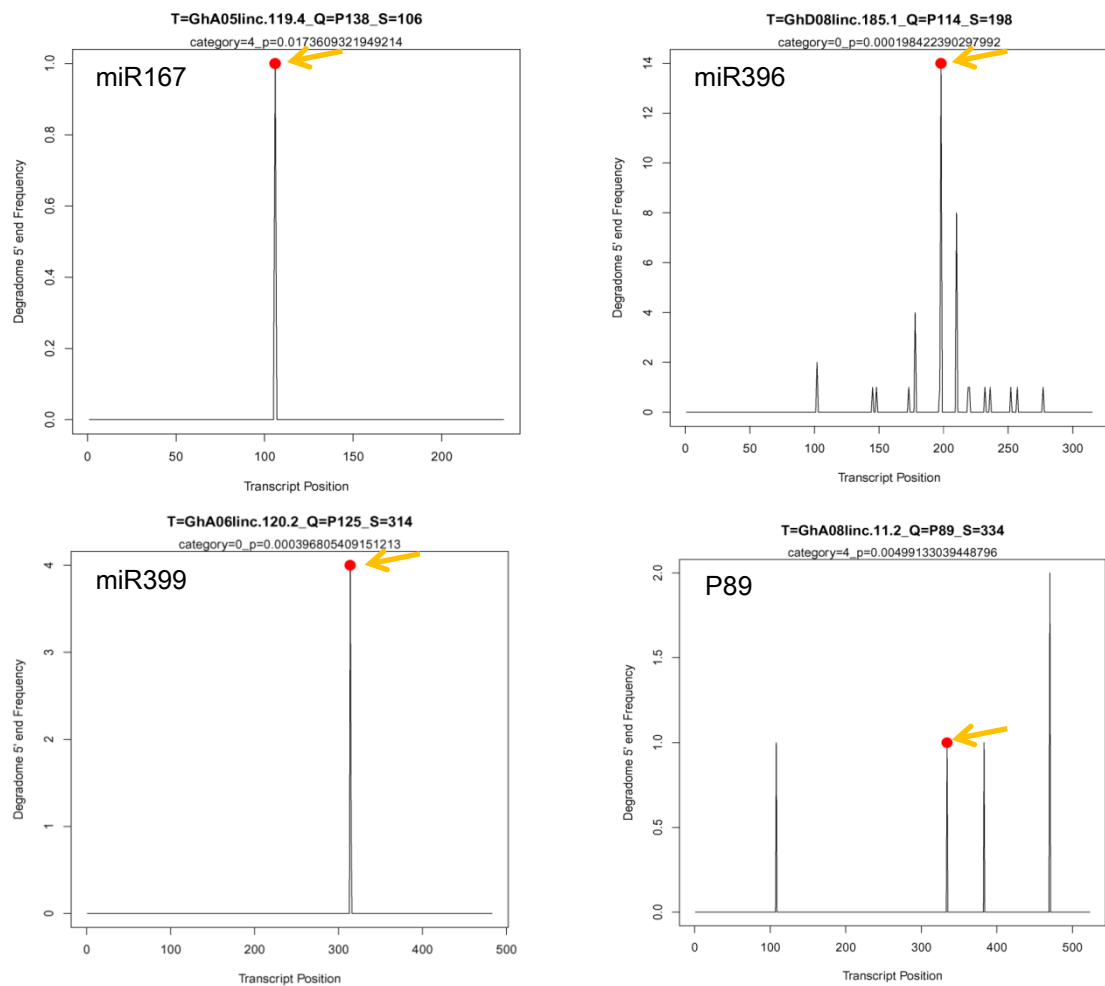

**Figure S5.** T-plots of the cotton miRNAs targeted by lincRNAs.

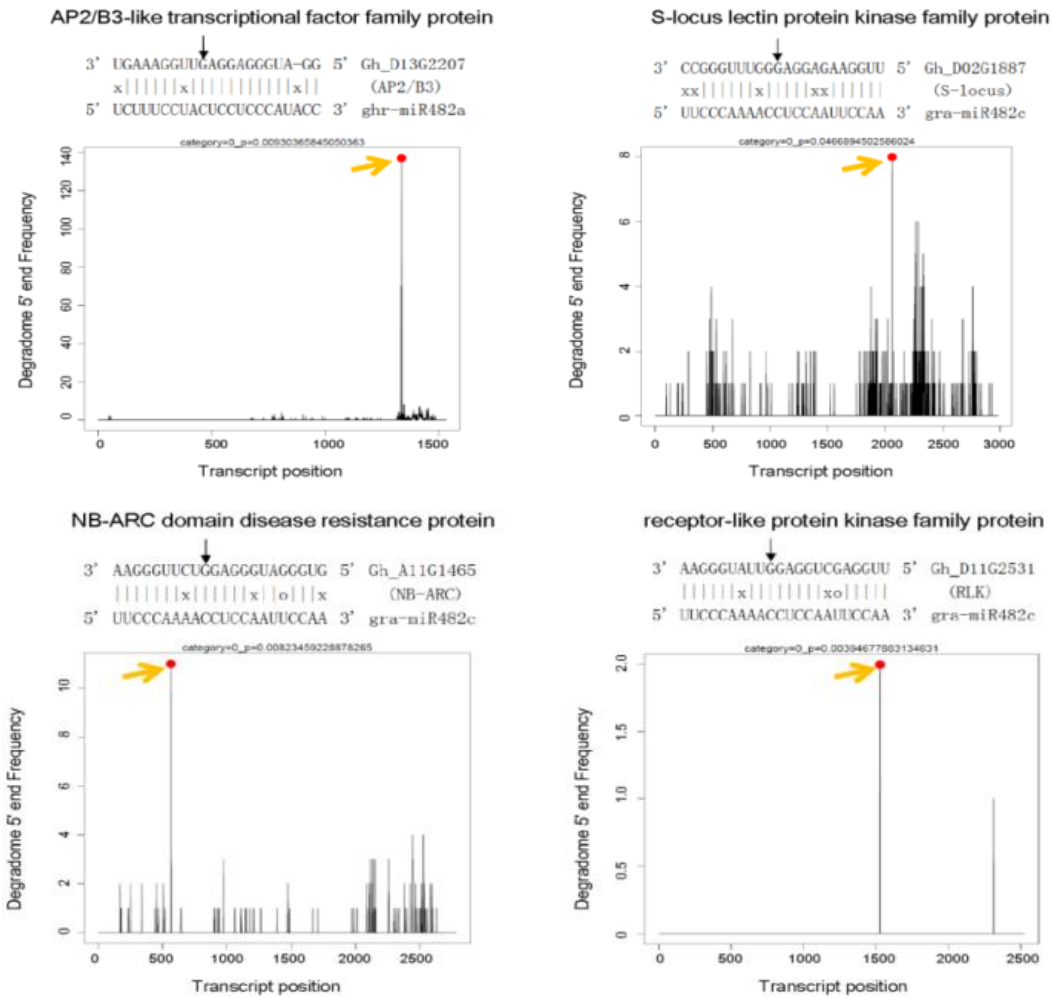

**Figure S6.** miR482 targets were confirmed by degradome sequencing.

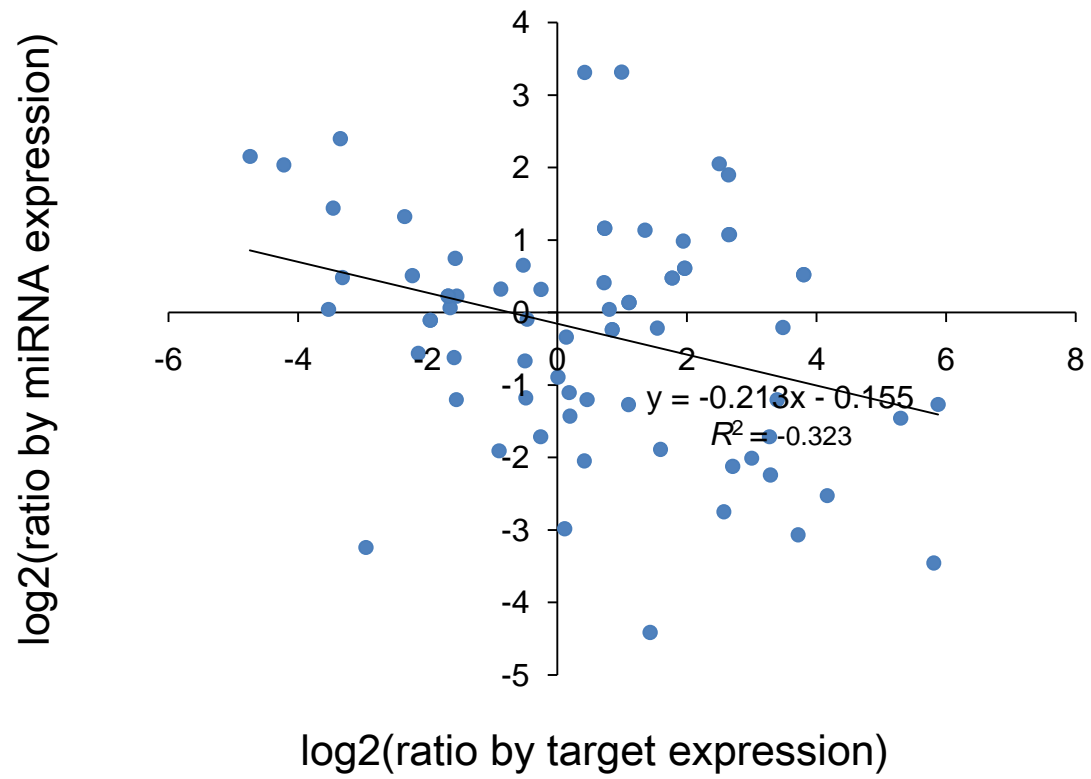

**Figure S7.** The expression of correlation between miRNA and their target gene.

| PHAS_ID | Nearby gene | start    | end      | Region     | miRBase21     | miRNA_length | Target_annotation | No.of siRNA |
|---------|-------------|----------|----------|------------|---------------|--------------|-------------------|-------------|
| PHAS1   | Gh_A10G0412 | 4109823  | 4110172  | Coverexon  | P138: miR167b | 21nt         | ARF8              | 6           |
| PHAS2   | Gh_D10G0426 | 4000280  | 4000629  | Coverexon  | P138: miR167b | 21nt         | ARF8              | 6           |
| PHAS3   | Gh_D07G1901 | 46743778 | 46744190 | intergenic | P187: miR390c | 21nt         | TAS3              | 11          |
| PHAS4   | Gh_A10G1561 | 85166412 | 85166845 | intergenic | P187: miR390c | 21nt         | TAS3              | 14          |
| PHAS5   | Gh_A06G0606 | 15588866 | 15589509 | exon       | P73           | 22nt         | NB-ARC            | 9           |
| PHAS6   | Gh_D06G0687 | 11881265 | 11881656 | exon       | P73           | 22nt         | NB-ARC            | 10          |
| PHAS7   | Gh_A05G2533 | 35115948 | 35116255 | exon       | P81           | 22nt         | NB-ARC            | 5           |
| PHAS8   | Gh_A11G0364 | 3393149  | 3393750  | exon       | P79: miR482a  | 22nt         | CC-NBS-LRR        | 16          |
| PHAS9   | Gh_D13G2207 | 58191228 | 58191535 | exon       | P80: miR482a  | 22nt         | AP2/B3            | 8           |

**Figure S8.** *PHAS* genes triggered by miRNAs identified in this report



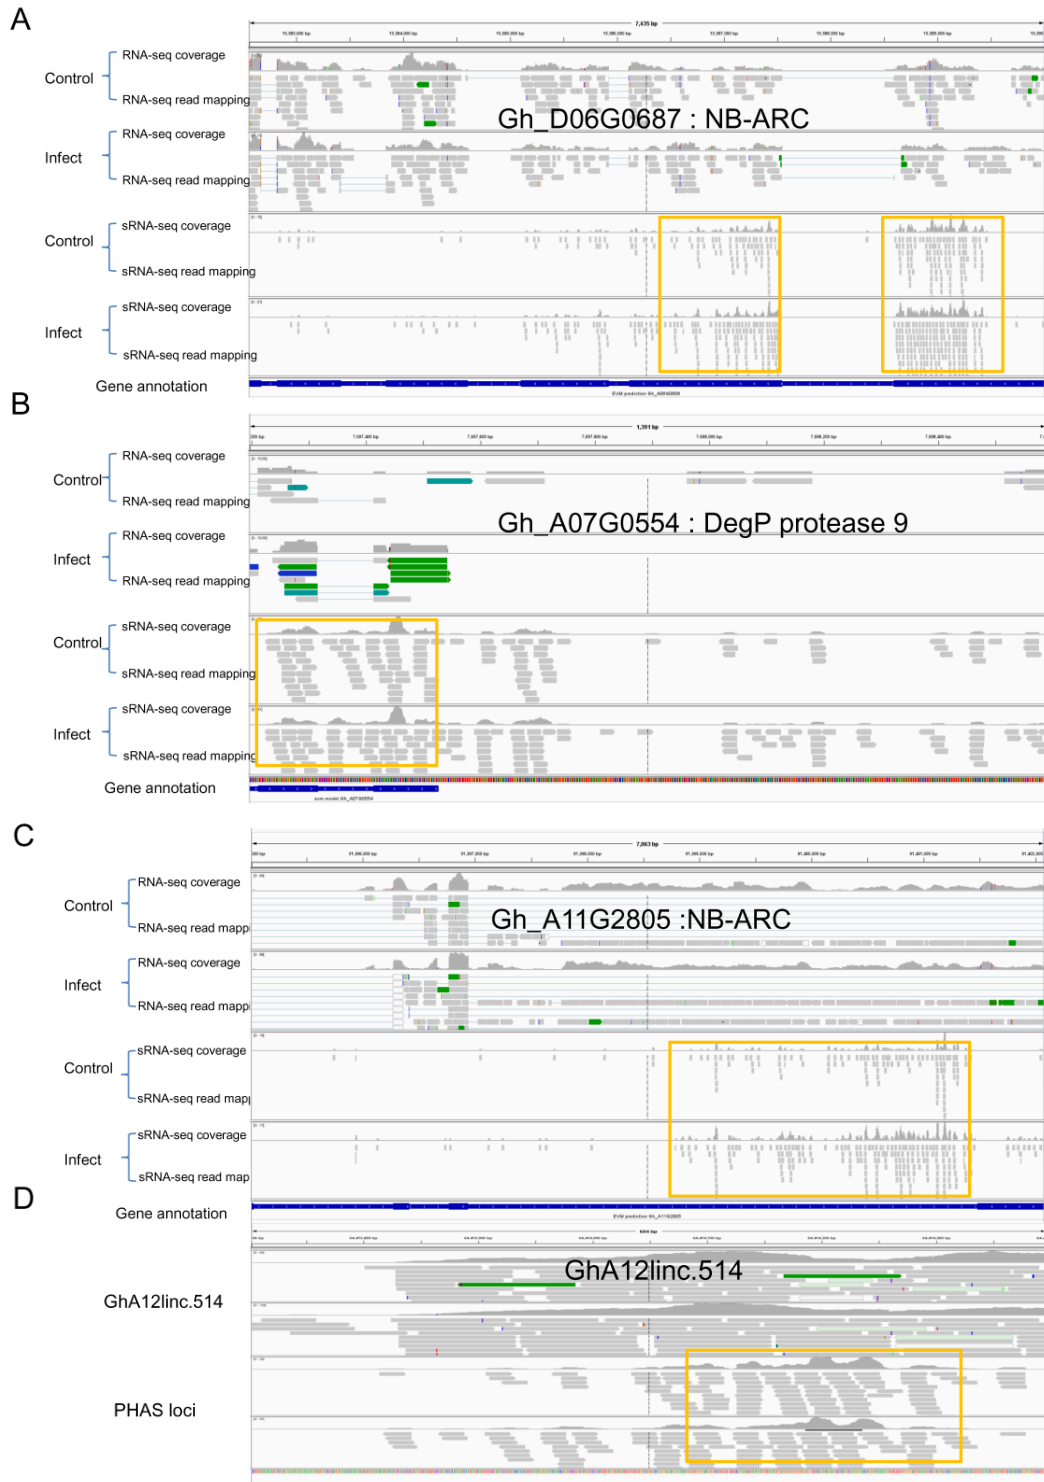

**Figure S9.** PhasiRNAs generated from different cotton genome regions. *A* NB-LRR protein generated phasiRNA loci in two alternative exons by a novel *P73* miRNA trigger. *B* Deg P protease-generated siRNAs from exon-intron-exon junctions. *C* NB-LRR protein generated siRNAs from a *bona fide* intron. *D* lincRNA-generated phasiRNAs.

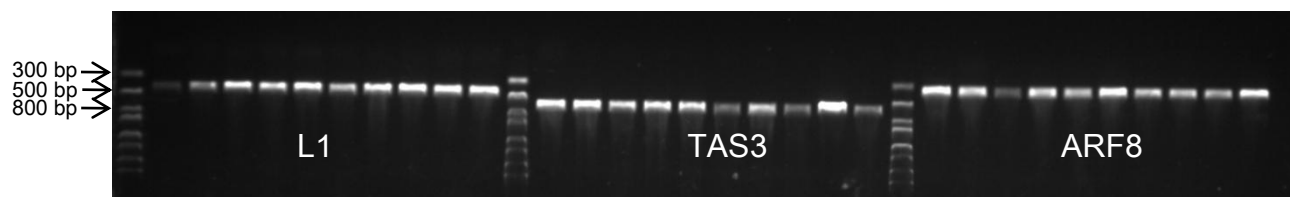

**Figure S10.** The VIGS vector construction.
